# Supplementary material for: Generation and Characterization of Induced Pluripotent Stem Cells from Aid-Deficient Mice
Source: PubMed Central journal article supplement (PMC3981863; doi:10.1371/journal.pone.0094735), 2014-04-09

# Figure S13

**A**

| <i>Aid</i> <sup>+/+</sup> MEFs  |                                 |                                 |                                 | <i>Aid</i> <sup>+/+</sup> iPS cells |       |       |       | <i>Aid</i> <sup>-/-</sup> iPS cells |            |       |       | ES cells |       |            |     |       |       |
|---------------------------------|---------------------------------|---------------------------------|---------------------------------|-------------------------------------|-------|-------|-------|-------------------------------------|------------|-------|-------|----------|-------|------------|-----|-------|-------|
| Clone name                      | <i>Aid</i> <sup>+/+</sup> MEF#1 | <i>Aid</i> <sup>+/+</sup> MEF#2 | <i>Aid</i> <sup>+/+</sup> MEF#3 | Clone name                          | 967B2 | 967B4 | 979B1 | 979B3                               | Clone name | 979F1 | 979F3 | 981E1    | 981E4 | Clone name | RF8 | MG1.1 | B6 ES |
| <i>Aid</i> <sup>+/+</sup> MEF#1 |                                 | 69%                             | 62%                             | 967B2                               |       | 69%   | 66%   | 60%                                 | 979F1      |       | 77%   | 74%      | 68%   | RF8        |     | 44%   | 46%   |
| <i>Aid</i> <sup>+/+</sup> MEF#2 |                                 |                                 | 53%                             | 967B4                               |       |       | 78%   | 71%                                 | 979F3      |       |       | 74%      | 67%   | MG1.19     |     |       | 27%   |
| <i>Aid</i> <sup>+/+</sup> MEF#3 |                                 |                                 |                                 | 979B1                               |       |       |       | 77%                                 | 981E1      |       |       |          | 63%   | B6 ES      |     |       |       |
|                                 |                                 |                                 |                                 | 979B3                               |       |       |       |                                     | 981E4      |       |       |          |       |            |     |       |       |

**B** *Aid*<sup>+/+</sup> MEFs vs *Aid*<sup>+/+</sup> iPS cells

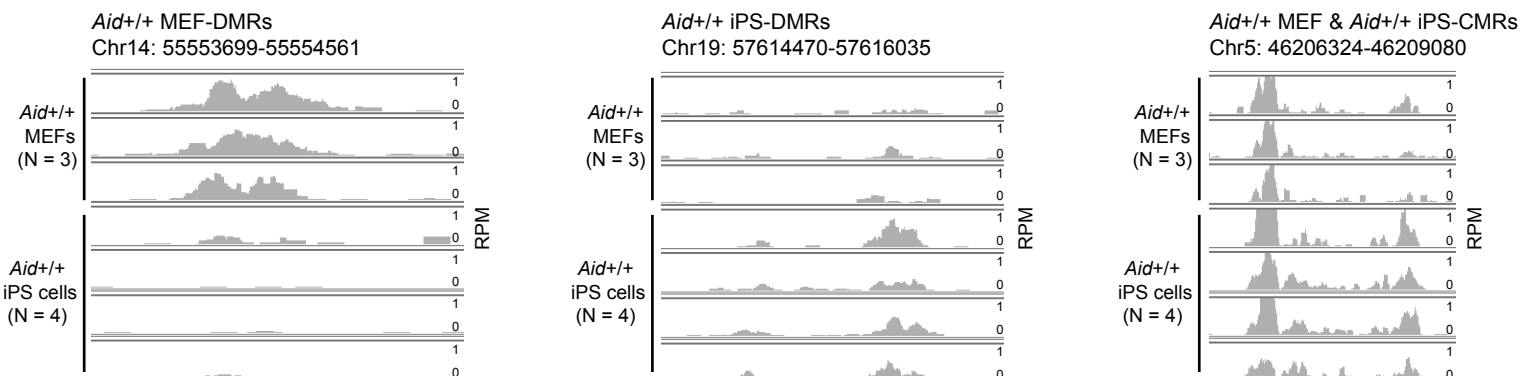

**C** ES cells vs *Aid*<sup>+/+</sup> iPS cells

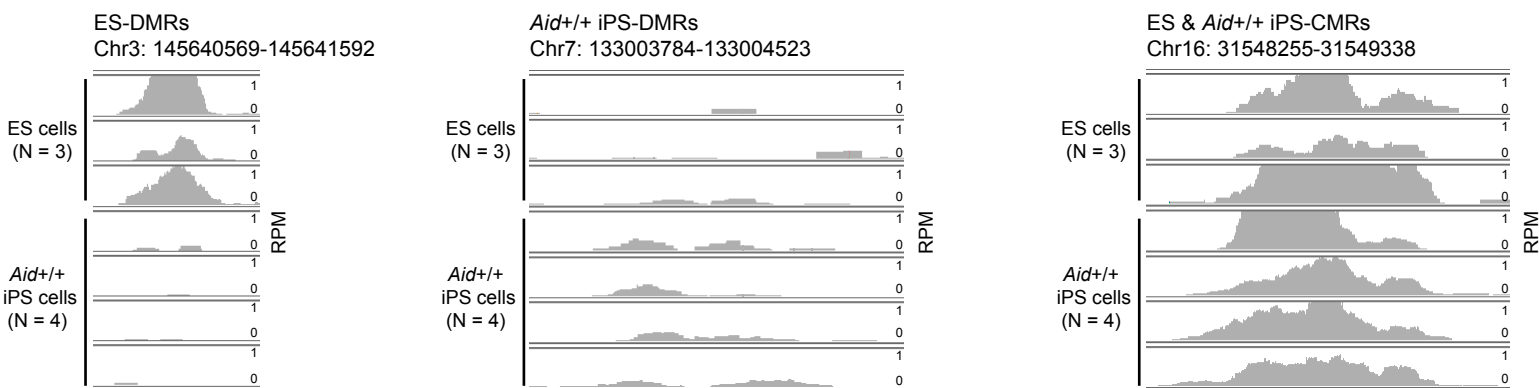

**D** *Aid*<sup>+/+</sup> iPS cells vs *Aid*<sup>-/-</sup> iPS cells

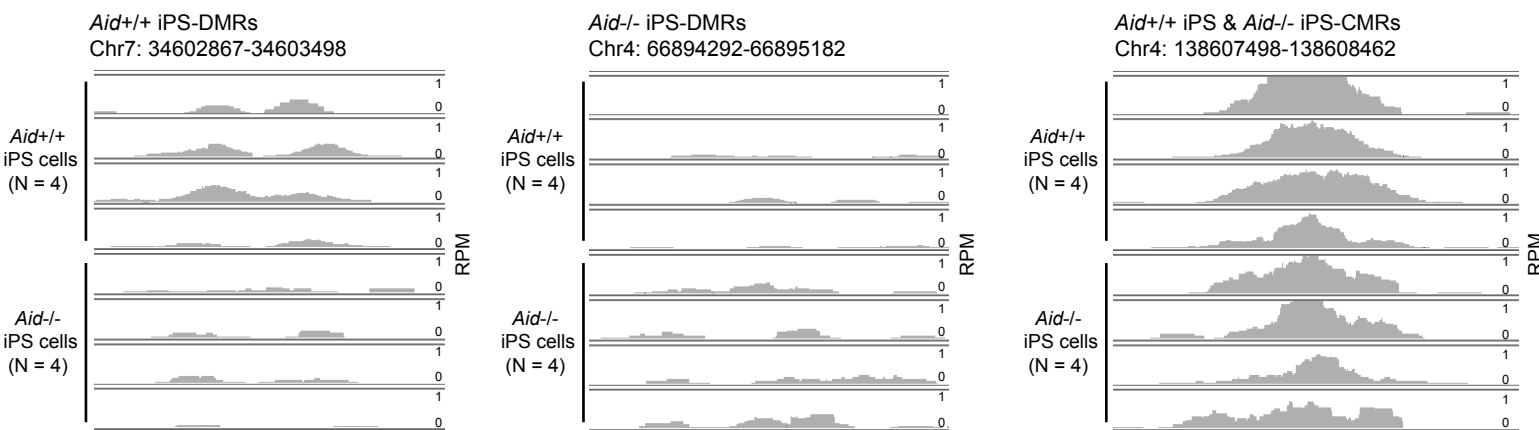

**E** Nanog promoter region

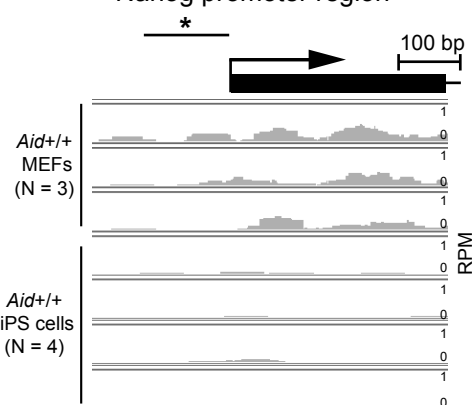

**E** Ecat1 promoter region

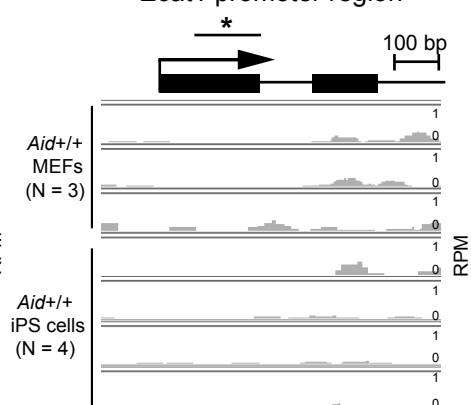

**F**

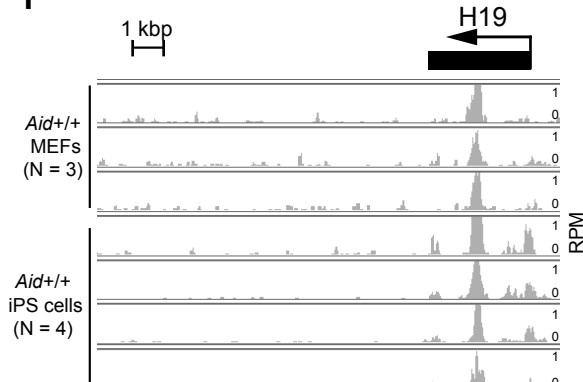

Supplement: pone.0094735.s013.pdf [file pone.0094735.s013.pdf]
