# Supplementary material for: Generation and Characterization of Induced Pluripotent Stem Cells from Aid-Deficient Mice
Source: PubMed Central journal article supplement (PMC3981863; doi:10.1371/journal.pone.0094735), 2014-04-09

Figure S1

A

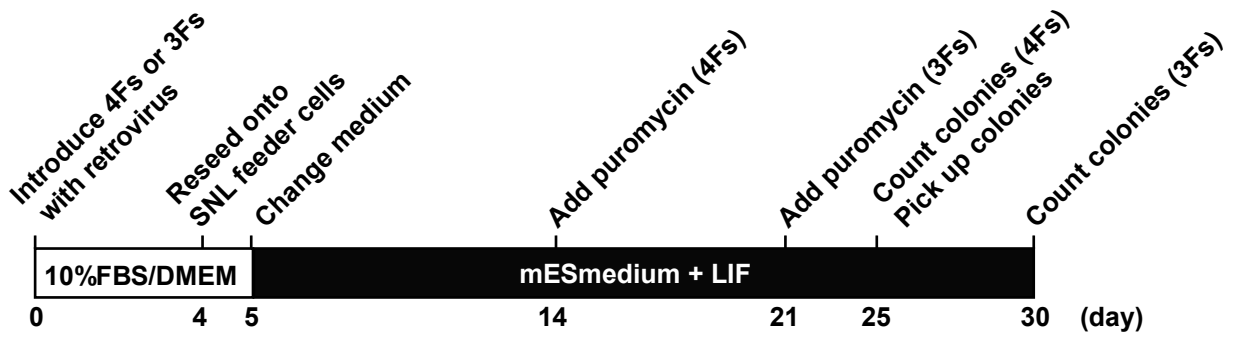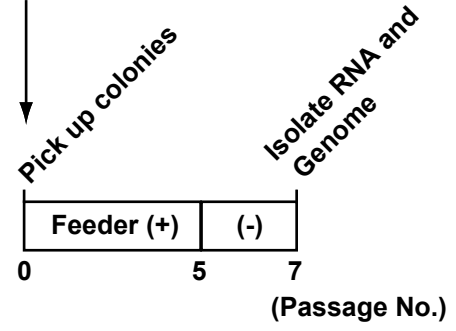

B

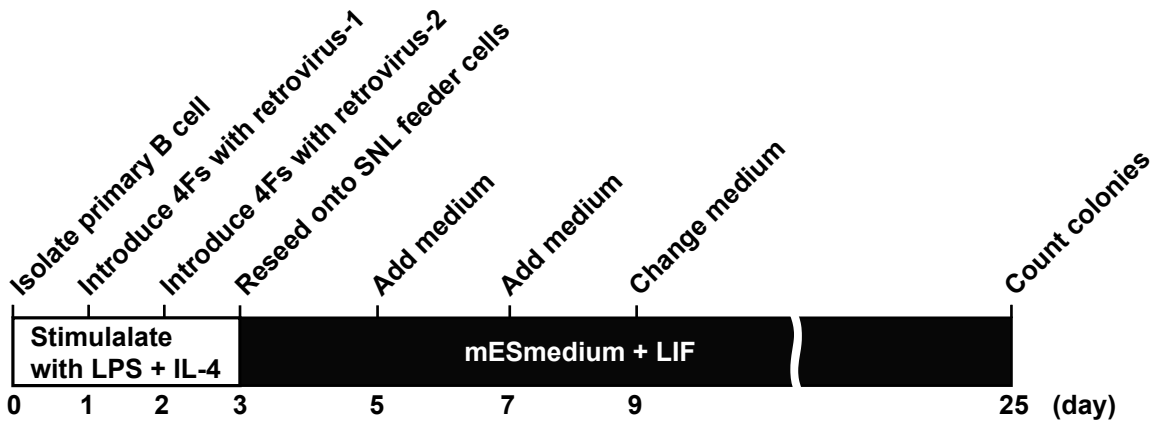

Supplement: pone.0094735.s001.pdf [file pone.0094735.s001.pdf]
