# Supplementary material for: Generation and Characterization of Induced Pluripotent Stem Cells from Aid-Deficient Mice
Source: PubMed Central journal article supplement (PMC3981863; doi:10.1371/journal.pone.0094735), 2014-04-09
Supplement: pone.0094735.s014.pdf [file pone.0094735.s014.pdf]

**Supplementary Table 1.****The efficiency of establishing *Aid*<sup>-/-</sup> iPS cells.**

| Experiment | Efficiency (%)                |                               |
|------------|-------------------------------|-------------------------------|
|            | <i>Aid</i> <sup>+/+</sup> iPS | <i>Aid</i> <sup>-/-</sup> iPS |
| Exp. 967   | 72 (18/25)                    | 75 (9/12)                     |
| Exp. 979   | 100 (12/12)                   | 100 (12/12)                   |
| Exp. 980   | 100 (6/6)                     | 100 (6/6)                     |
| Average    | 90.7 ± 16.2                   | 91.7 ± 14.4                   |

Nanog-GFP positive *Aid*<sup>+/+</sup> and *Aid*<sup>-/-</sup> iPS colonies were picked up mechanically and passaged four times on feeder cells and two times on gelatin coated dish. Judging by their morphology and GFP fluorescence, number of undifferentiated clones was counted. Number in parenthesis indicates number of undifferentiated clones among total clones.
