# Supplementary material for: Generation and Characterization of Induced Pluripotent Stem Cells from Aid-Deficient Mice
Source: PubMed Central journal article supplement (PMC3981863; doi:10.1371/journal.pone.0094735), 2014-04-09
Supplement: pone.0094735.s015.pdf [file pone.0094735.s015.pdf]

## Supplementary Table 2.

A list of the differentially expressed probes between *Aid*<sup>+/+</sup> and *Aid*<sup>-/-</sup> iPS cells.

| ProbeName      | GeneSymbol    | Regulation |
|----------------|---------------|------------|
| A_51_P358894   | Ttc9b         | up         |
| A_55_P2107775  | Apol9a        | up         |
| A_30_P01021193 |               | up         |
| A_51_P394814   | Svep1         | up         |
| A_55_P1974612  | C030039L03Rik | up         |
| A_52_P154741   | Lgals6        | up         |
| A_51_P318830   | Syt10         | up         |
| A_55_P2168223  | Aicda         | up         |
| A_30_P01029269 |               | up         |
| A_52_P560146   | Gm22          | up         |
| A_30_P01024160 |               | up         |
| A_30_P01019832 |               | up         |
| A_55_P2022288  | Gm6662        | up         |
| A_30_P01020677 |               | up         |
| A_30_P01025542 |               | up         |
| A_30_P01023098 |               | up         |
| A_30_P01030925 |               | up         |
| A_52_P244956   | Aicda         | up         |
| A_30_P01030806 |               | up         |
| A_55_P2027731  | Il1r1         | up         |
| A_52_P191567   | Plcl1         | up         |
| A_51_P355753   | Hic1          | up         |
| A_30_P01018499 |               | up         |
| A_52_P117393   | Tlr6          | up         |
| A_30_P01028192 |               | up         |
| A_30_P01031183 |               | up         |
| A_51_P334979   | Apoc2         | down       |
| A_55_P2090768  |               | down       |
| A_30_P01025529 |               | down       |
| A_52_P148514   | Hpse          | down       |
| A_51_P345340   | 2310043J07Rik | down       |
| A_55_P2052071  | Gsx2          | down       |
| A_55_P2196447  | 9430069I07Rik | down       |
| A_30_P01029697 |               | down       |
| A_30_P01023023 |               | down       |
| A_55_P2055315  |               | down       |
| A_52_P150547   | Cd8a          | down       |
| A_30_P01025622 |               | down       |

Six clones of *Aid*<sup>+/+</sup> and *Aid*<sup>-/-</sup> iPS cells were compared with microarray (fold change > 2, corrected *p*-value < 0.05). Twenty six up-regulated and 12 down regulated probes are detected.
