# Supplementary material for: Generation and Characterization of Induced Pluripotent Stem Cells from Aid-Deficient Mice
Source: PubMed Central journal article supplement (PMC3981863; doi:10.1371/journal.pone.0094735), 2014-04-09
Supplement: pone.0094735.s016.pdf [file pone.0094735.s016.pdf]

**Supplementary Table 3.**  
**A summary of the blastocyst injection.**

|                                     | Clone name | Number of born mice | Number of chimeras |
|-------------------------------------|------------|---------------------|--------------------|
| <i>Aid</i> <sup>-/-</sup> iPS cells | 946B27     | 101                 | 35                 |
|                                     | 946B28     | 37                  | 13                 |
|                                     | 953E15     | 47                  | 13                 |
|                                     | 953E29     | 44                  | 21                 |
|                                     | 1007KF1    | 38                  | 7                  |
|                                     | 1007KF3    | 16                  | 1                  |
|                                     | 1007KF5    | 11                  | 1                  |
|                                     | 1007KF6    | 27                  | 0                  |
| <i>Aid</i> <sup>+/+</sup> iPS cells | 1007KA1    | 21                  | 1                  |
|                                     | 1007KA2    | 21                  | 5                  |
|                                     | 1007KA3    | 13                  | 2                  |

Three *Aid*<sup>+/+</sup> iPS cell clones and eight *Aid*<sup>-/-</sup> iPS cell clones were tested. Number of born mice and chimeras are shown.
