# Supplementary material for: Generation and Characterization of Induced Pluripotent Stem Cells from Aid-Deficient Mice
Source: PubMed Central journal article supplement (PMC3981863; doi:10.1371/journal.pone.0094735), 2014-04-09
Supplement: pone.0094735.s017.pdf [file pone.0094735.s017.pdf]

**Supplementary Table 4.**  
**A summary of the MBD-seq findings.**

| Clone name                          | Total reads | Number of reads mapped to reference | Ratio (%)  | Number of detected regions |         |
|-------------------------------------|-------------|-------------------------------------|------------|----------------------------|---------|
| <i>Aid</i> <sup>+/+</sup> iPS cells | 967B2       | 33,467,319                          | 28,386,827 | 85                         | 78,847  |
|                                     | 967B4       | 41,086,765                          | 36,374,628 | 89                         | 88,332  |
|                                     | 979B1       | 41,090,944                          | 36,919,117 | 90                         | 100,339 |
|                                     | 979B3       | 39,983,206                          | 35,696,402 | 89                         | 110,943 |
| <i>Aid</i> <sup>-/-</sup> iPS cells | 979F1       | 34,063,142                          | 27,101,491 | 80                         | 91,536  |
|                                     | 979F3       | 33,582,883                          | 27,226,008 | 81                         | 91,985  |
|                                     | 981E1       | 39,004,447                          | 31,281,996 | 80                         | 90,683  |
|                                     | 981E4       | 32,280,472                          | 24,950,886 | 77                         | 69,669  |
| ES cells                            | RF8         | 32,061,578                          | 20,124,759 | 63                         | 58,916  |
|                                     | MG1.19      | 35,230,050                          | 26,874,357 | 76                         | 33,694  |
|                                     | B6 ES       | 41,642,948                          | 29,714,737 | 71                         | 106,385 |
| <i>Aid</i> <sup>+/+</sup> MEFs      | #1          | 38,856,522                          | 27,563,519 | 71                         | 48,395  |
|                                     | #2          | 37,404,390                          | 30,113,821 | 81                         | 57,893  |
|                                     | #3          | 35,428,777                          | 27,825,300 | 79                         | 35,546  |
