# Supplementary material for: Generation and Characterization of Induced Pluripotent Stem Cells from Aid-Deficient Mice
Source: PubMed Central journal article supplement (PMC3981863; doi:10.1371/journal.pone.0094735), 2014-04-09
Supplement: pone.0094735.s018.pdf [file pone.0094735.s018.pdf]

## Supplementary Table 5.

### The classification of the methylated regions detected by MBD-seq.

(A) *Aid*<sup>+/+</sup> iPS cells vs *Aid*<sup>+/+</sup> MEFs

|                                    | Region   |            |           |        | Total  |
|------------------------------------|----------|------------|-----------|--------|--------|
|                                    | Promoter | Terminator | Gene body | Others |        |
| <i>Aid</i> <sup>+/+</sup> iPS-DMRs | 372      | 477        | 7,976     | 8,546  | 17,371 |
| <i>Aid</i> <sup>+/+</sup> MEF-DMRs | 152      | 96         | 828       | 858    | 1,934  |
| CMRs                               | 540      | 796        | 9,887     | 12,930 | 24,153 |

(B) *Aid*<sup>+/+</sup> iPS cells vs ES cells

|                                    | Region   |            |           |        | Total  |
|------------------------------------|----------|------------|-----------|--------|--------|
|                                    | Promoter | Terminator | Gene body | Others |        |
| <i>Aid</i> <sup>+/+</sup> iPS-DMRs | 22       | 29         | 440       | 681    | 1,172  |
| ES-DMRs                            | 3        | 0          | 11        | 16     | 30     |
| CMRs                               | 390      | 645        | 9,392     | 14,525 | 24,952 |

(C) *Aid*<sup>+/+</sup> iPS cells vs *Aid*<sup>-/-</sup> iPS cells

|                                    | Region   |            |           |        | Total  |
|------------------------------------|----------|------------|-----------|--------|--------|
|                                    | Promoter | Terminator | Gene body | Others |        |
| <i>Aid</i> <sup>+/+</sup> iPS-DMRs | 4        | 3          | 104       | 123    | 234    |
| <i>Aid</i> <sup>-/-</sup> iPS-DMRs | 1        | 1          | 18        | 32     | 52     |
| CMRs                               | 1,143    | 1,640      | 22,644    | 26,301 | 51,728 |

Methylated regions were classified into promoter (within two kbp upstream from transcription start site), terminator (within two kbp downstream from transcription terminator), genebody (between transcription start site and transcription terminator) and others.
