# Supplementary material for: Generation and Characterization of Induced Pluripotent Stem Cells from Aid-Deficient Mice
Source: PubMed Central journal article supplement (PMC3981863; doi:10.1371/journal.pone.0094735), 2014-04-09
Supplement: pone.0094735.s020.pdf [file pone.0094735.s020.pdf]

**Supplementary Table 7.**  
**The primers used in the present study.**

| Name                         | Sequence                                                   | Applications                             | Reference |
|------------------------------|------------------------------------------------------------|------------------------------------------|-----------|
| mAid F                       | CACCATGGACAGCCTTCTGATGAA                                   | Cloning/Aid                              |           |
| mAid R                       | TCAAAATCCCAACATACGAAATGC A                                 |                                          |           |
| mApobec1 F                   | CACCATGAGTTCCGAGACAGGCC                                    | Cloning/Apobec1                          |           |
| mApobec1 R                   | TCATTTCAACCCGTAGCCCAAAG G                                  |                                          |           |
| mApobec1 H61K_S              | GAAGTTGACTTCAACTTTGTGCTGGTGTITTTG                          | Mutagenesis/Apobec1                      | [20]      |
| mApobec1 H61K_AS             | CAAAACACCAGCAACAAGTTGAAGTCAACTTC                           |                                          |           |
| mApobec C93S/C96S_S          | GCCCTGGAGCTCTCCCGCTGGGACTCCAG                              |                                          |           |
| mApobec C93S/C96S_AS         | CTGGAGTCCCAGCGGGGAGAGCTCCAGGGC                             |                                          |           |
| mKLF4cDNAs1064               | CACCATGGACCCGGGCGTGGCTGCCAGAAA                             | cDNA probe for Souther blot analysis     |           |
| mKLF4cDNAs1769               | TTAGGCTGTCTTTTCCGGGGCCACGA                                 |                                          |           |
| Control PrimerF              | ACCACAGTCCATGCCATCAC                                       | PCR/Gapdh                                |           |
| Control Primer R             | TCCACCACCTGTTGCTGTA                                        |                                          |           |
| Oct3/4-S9                    | TCTTTCACCAGGCCCCCGCTC                                      | PCR/Oct3/4                               |           |
| Oct3/4-AS210                 | TGCGGGCGGACATGGGGAGATCC                                    |                                          |           |
| 6047-S4                      | AGGGTCTGCTACTGAGATGCTCTG                                   | PCR/Nanog                                |           |
| 6047-AS5                     | CAACCACTGGTTTTCTGCCACCG                                    |                                          |           |
| 45328-S118                   | ACTGCCCTCATCAGACTGCTACT                                    | PCR/ERas                                 |           |
| ERas-AS304                   | CACTGCCTGTACTCGGGTAGCTG                                    |                                          |           |
| pH34-U38                     | GAAGTCTGGTTCCTTGGCAGGATG                                   | PCR/Esg1                                 | [1]       |
| pH34-L394                    | ACTCGATACACTGGCCTAGC                                       |                                          |           |
| Ecat1-RT-S                   | TGTGGGGCCCTGAAAGGCGAGCTGAGA T                              | PCR/Ecat1                                |           |
| Ecat1-RT-AS                  | ATGGGCCCCATACGACGAGCTCAACT                                 |                                          |           |
| mOct3/4-S1120                | CCCTGGGATGCTGTGAGCCAAGG                                    | PCR/Oct3/4 Tg                            |           |
| pMXs-AS3200                  | TTATCGTCCGACCACTGTGCTGCTG                                  |                                          |           |
| Sox2-S768                    | GGTTACCTTCTCCTCCCACTCCAG                                   | PCR/Sox2 Tg                              |           |
| pMXs-AS3200                  | TTATCGTCCGACCACTGTGCTGCTG                                  |                                          |           |
| Klf4-S1236                   | GCGAACTCACACAGGCGGAAACC                                    | PCR/Klf4 Tg                              |           |
| pMXs-AS3200                  | TTA TCG TCG ACC ACT GTG CTG CTG                            |                                          |           |
| c-Myc-S1093                  | CAG AGG AGG AAC GAG CTG AAG CGC                            | PCR/c-Myc Tg                             |           |
| pMXs-AS3200                  | TTATCGTCCGACCACTGTGCTGCTG                                  |                                          |           |
| mAID-185-S                   | CGTGGTGAAGAGGAGAGATAGTG                                    | PCR/Aid                                  |           |
| mAID-295-AS                  | CAGTCTGAGATGTAGCGTAGGAA                                    |                                          |           |
| Apobec1 Fw3                  | GAGCCGACCCCTATGTAA                                         | PCR/Apobec1                              |           |
| Apobec1 Rv3                  | TTGGCCAATAAGCTTCTGTTGA                                     |                                          |           |
| mAID-238-S                   | CTGCCAAACCTGATGCTTTGAGTTTGAT                               | Genotyping PCR/Aid <sup>+/+</sup> allele | [12]      |
| mAID-L3-AS                   | AACCAAGCCTATGCCTACAGCATCCAGG                               |                                          |           |
| mAID-227-S                   | CAACGTGGCGTCCAAACAGGCACTTCCG                               | Genotyping PCR/Aid <sup>+/+</sup> allele |           |
| mAID-175-AS                  | GGTCCAGTCTGAGATGTAGCGTAGG                                  |                                          |           |
| pLKO.1-shAid#1-sense         | CCGGGAAGTCGATGACTTGGGAGATCTCGAGATCTCGCAAGTCATCGACTTCTTTTG  | shAid#1                                  |           |
| pLKO.1-shAid#1-antisense     | AATTCAAAAAGAAGTCGATGACTTGGGAGATCTCGAGATCTCGCAAGTCATCGACTTC |                                          |           |
| pLKO.1-shAid#2-sense         | CCGGCATGACCTTCAAAGACTATTTCTCGAGAAATAGTCTTTGAAGTCATGTTTTTG  | shAid#2                                  | [19]      |
| pLKO.1-shAid#2-antisense     | AATTCAAAAACATGACCTTCAAAGACTATTTCTCGAGAAATAGTCTTTGAAGTCATG  |                                          |           |
| pLKO.1-shAid#3-sense         | CCGGCTGTGACTTAGAACTTCTCTCGAGAGAAGTTTCTAAGTCACAGTTTTTG      | shAid#3                                  |           |
| pLKO.1-shAid#3-antisense     | AATTCAAAAACTGTGACTTAGAACTTCTCTCGAGAGAAGTTTCTAAGTCACAG      |                                          |           |
| pLKO.1-shAid#4-sense         | CCGGCAGTCCGATTATAATGCACTCGAGTGCATTATAATGGCGACTG TTTTTG     | shAid#4                                  |           |
| pLKO.1-shAid#4-antisense     | AATTCAAAAACAGTCGCCATTATAATGCACTCGAGTGCATTATAATGGCGACTG     |                                          |           |
| meNanog-F2-S                 | GATTTTGTAGTGGGATTAATTGTGAATTT                              | Pyrosequencing/Nanog-PCR                 |           |
| meNanog-333AS-5'bio          | Bio-ACTAAATTCCTTACCAACCTCTATAC                             |                                          |           |
| mNanog region8-p1,2-pyroseq  | GAATTTATAGGGTTGGTG                                         | Pyrosequencing/Nanog-Sequence            |           |
| mNanog region8-p3,4-pyroseq  | AGGAGTAGGATTTATTTTTAAATT                                   |                                          |           |
| Oct PRO F                    | TGGGTTGAAATATTGGGTTTATTT                                   | Pyrosequencing/Oct3/4-PCR                |           |
| Oct PRO R-bio                | Bio-CTAAACCAAAATATCCAACCATA                                |                                          |           |
| mOct4 region2-p4,5,6-pyroseq | GTAGTGTTAATAGGTTTTGT                                       | Pyrosequencing/Oct3/4-Sequence           | [*]       |
| mOct4 region2-p7,8-pyroseq   | GTTTAGTTTTAAGGGTTGTTTTG                                    |                                          |           |
| meECAT1-F1-S                 | TTAATGTTGGGATTAAGGGTGTGTTGTTT                              | Pyrosequencing/Ecat1-PCR                 |           |
| meECAT1-F1-AS-bio            | Bio-TTACCTTAACCTTTCCAATTCACCTACCAA                         |                                          |           |
| Ecat1prom1-119CpG#1-4 seq    | GATTTTGGAGTTTGTATAGGT                                      | Pyrosequencing/Ecat1-Sequence            |           |
| Ecat1prom1-119CpG#5-7 seq    | TTTAAGTTGTTAAGTGGTTTT                                      |                                          |           |

\*: Primers for the pyrosequence were modified from the primers used in the journal; Imamura M, Miura K, Iwabuchi K, Ichisaka T, Nakagawa M, et al. (2006) Transcriptional repression and DNA hypermethylation of a small set of ES cell marker genes in male germline stem cells. BMC developmental biology 6: 34. doi:10.1186/1471-213X-6-34.
